# Supplementary material
Source: Springer Nature journal article supplement (https://www.springermedizin.de/resource/supplementary/12913_2011_2437_MOESM1_ESM.pdf/9531266)
Supplement: MOESM1 [file 9531266]

Breast cancer cases  
Piedmont Region 2002  
Age 50-69 years  
N incident cancers=**1764**  
N prevalent cancers=**111**

Surgery in first 6 months of 2002  
N incident cancers=**866**

Randomly-selected study sample:  
N=**600**

|                                 |      |
|---------------------------------|------|
| (Invasive lesions               | =521 |
| <i>In situ</i>                  | =25  |
| Neoplasm of uncertain behaviour | =35  |
| Neoplasm of unspecified nature  | =19) |

Study population  
N=542

**Data from clinical records evaluation:**

|    |                                |    |
|----|--------------------------------|----|
| 30 | Not eligible:                  | 32 |
| 17 | Benign lesion                  | 32 |
| 2  | Prevalent lesions              | 4  |
| 2  | Recurrences                    | 1  |
| 0  | Other cancers                  | 2  |
| 7  | No surgery                     | 0  |
|    | Not available clinical records |    |

Invasive lesions  
N=468  
86.3%

Microinvasive lesions  
N=9  
1.7%

*In situ* lesions  
N=65  
12.0%

Breast cancer cases  
Piedmont Region 2004  
Age 50-69 years  
N incident cancers=**1777**  
N prevalent cancers=**117**

Surgery in first 6 months of 2004  
N incident cancers=**905**

Randomly-selected study sample:  
N=**621**

|                                 |      |
|---------------------------------|------|
| (Invasive lesions               | =559 |
| <i>In situ</i>                  | =28  |
| Neoplasm of uncertain behaviour | =22  |
| Neoplasm of unspecified nature  | =12) |

Study population  
N=550

**Main lesion:**

Invasive lesions  
N=479  
87.1%

Microinvasive lesions  
N=15  
2.7%

*In situ* lesions  
N=56  
10.2%
